# Supplementary material for: Awareness and Knowledge Regarding the Consumption of Dietary Fiber and Its Relation to Self-Reported Health Status in an Adult Arab Population: A Cross-Sectional Study
Source: PubMed Central journal article supplement (PMC7345011; doi:10.3390/ijerph17124226), 2020-06-13
Supplement: ijerph-17-04226-s001.pdf [file ijerph-17-04226-s001.pdf]

# Awareness, Knowledge and Consumption of Dietary Fiber and its Relation with Self-reported Health Status in Adult Arab Population: A Cross-Sectional Study

Hanan Alfawaz<sup>1,2,#,\*</sup>, Nasiruddin Khan<sup>3,#</sup>, Haya Alhuthayli<sup>1</sup>, Kaiser Wani<sup>2</sup>, Muneerah A. Aljumah<sup>5</sup>, Malak Nawaz Khan Khattak<sup>2</sup>, Saad A. Alghanim<sup>4</sup> and Nasser M. Al-Daghri<sup>2</sup>.

**Estimation of Cronbach's Alpha coefficient:** The responses from 50 participants of the pilot study were used to calculate the Cronbach's alpha coefficient for four sections of the questionnaire related to knowledge, preference, perception and consumption of DF. This was done using SPSS and the results are displayed below

## Section 1: Consumption of Food items rich In Dietary fibers (30 items)

### Case Processing Summary

|       |                       | N  | %     |
|-------|-----------------------|----|-------|
| Cases | Valid                 | 41 | 82.0  |
|       | Excluded <sup>a</sup> | 9  | 18.0  |
|       | Total                 | 50 | 100.0 |

a. Listwise deletion based on all variables in the procedure.

### Item-Total Statistics

|                         | Scale Mean if Item Deleted | Scale Variance if Item Deleted | Corrected Item-Total Correlation | Cronbach's Alpha if Item Deleted |
|-------------------------|----------------------------|--------------------------------|----------------------------------|----------------------------------|
| Salad                   | 12.951                     | 37.398                         | .157                             | .866                             |
| Cooked_vegetables       | 13.000                     | 36.500                         | .326                             | .863                             |
| fruit_juice             | 13.244                     | 37.939                         | -.007                            | .873                             |
| Fresh_peeled_Vegetables | 13.366                     | 37.538                         | .057                             | .871                             |
| Fruit_with_peel         | 13.244                     | 37.939                         | -.007                            | .873                             |
| Brown_Juice             | 13.098                     | 36.090                         | .344                             | .863                             |
| Cereals_Such_Wheat      | 13.146                     | 35.578                         | .417                             | .861                             |
| Maize                   | 13.512                     | 35.306                         | .467                             | .860                             |
| Burghul                 | 13.561                     | 34.402                         | .673                             | .854                             |
| Barley                  | 13.683                     | 36.972                         | .240                             | .865                             |
| Millet                  | 13.756                     | 37.139                         | .291                             | .864                             |

|                 |        |        |      |      |
|-----------------|--------|--------|------|------|
| Quinoa          | 13.683 | 35.422 | .609 | .857 |
| Peanuts         | 13.317 | 34.822 | .514 | .858 |
| pistachios      | 13.049 | 35.698 | .454 | .860 |
| Almonds         | 13.220 | 34.076 | .663 | .854 |
| Walnuts         | 13.488 | 34.856 | .540 | .858 |
| Pineapple_Dried | 13.390 | 35.294 | .435 | .860 |
| Dried_Dates     | 13.293 | 37.812 | .013 | .872 |
| Hazelnut        | 13.512 | 35.556 | .421 | .861 |
| Raisin          | 13.415 | 35.399 | .421 | .861 |
| Figs            | 13.463 | 34.355 | .621 | .855 |
| Apricot         | 13.561 | 35.352 | .486 | .859 |
| Shea_Seeds      | 13.585 | 35.599 | .454 | .860 |
| Beans_Fava      | 13.122 | 35.560 | .432 | .861 |
| Oats            | 13.244 | 35.289 | .440 | .860 |
| Lentils_Yellow  | 13.268 | 35.901 | .331 | .863 |
| Chickpeas       | 13.244 | 34.139 | .645 | .854 |
| Green_Beans     | 13.366 | 34.638 | .547 | .857 |
| White_Beans     | 13.683 | 36.672 | .310 | .864 |
| Libya_beans     | 13.585 | 35.049 | .565 | .857 |

#### Reliability Statistics

| Cronbach's Alpha | N of Items |
|------------------|------------|
| .866             | 30         |

#### Scale Statistics

| Mean   | Variance | Std. Deviation | N of Items |
|--------|----------|----------------|------------|
| 13.829 | 38.145   | 6.1762         | 30         |

#### Section 2: Knowledge about role of DF in health (8 items)

#### Case Processing Summary

|       |                       | N  | %     |
|-------|-----------------------|----|-------|
| Cases | Valid                 | 32 | 64.0  |
|       | Excluded <sup>a</sup> | 18 | 36.0  |
|       | Total                 | 50 | 100.0 |

a. Listwise deletion based on all variables in the procedure.

**Item-Total Statistics**

|                                                          | Scale Mean if Item Deleted | Scale Variance if Item Deleted | Corrected Item-Total Correlation | Cronbach's Alpha if Item Deleted |
|----------------------------------------------------------|----------------------------|--------------------------------|----------------------------------|----------------------------------|
| Help_Prevent_Obesity                                     | 11.4688                    | 7.612                          | .565                             | .657                             |
| Fiber_Regulated_Blood_S<br>uger                          | 11.1875                    | 7.383                          | .338                             | .705                             |
| Reduce_Blood_Cholestro<br>l                              | 11.2188                    | 6.951                          | .526                             | .654                             |
| Prevention_of_bowel<br>Increase_Problem_Consti<br>pation | 11.1563                    | 7.555                          | .298                             | .715                             |
| Too_much_fiber_harmful                                   | 10.7500                    | 8.452                          | .319                             | .700                             |
| Fiber_Flatulence                                         | 10.6250                    | 7.661                          | .466                             | .672                             |
| Fiber_CVD                                                | 10.9375                    | 7.996                          | .358                             | .693                             |
|                                                          | 11.4688                    | 7.870                          | .473                             | .673                             |

**Reliability Statistics**

| Cronbach's Alpha | N of Items |
|------------------|------------|
| .712             | 8          |

**Scale Statistics**

| Mean    | Variance | Std. Deviation | N of Items |
|---------|----------|----------------|------------|
| 12.6875 | 9.641    | 3.10502        | 8          |

**Section 3: Preference of foods while eating out (6 items)**

**Case Processing Summary**

|       |                       | N  | %     |
|-------|-----------------------|----|-------|
| Cases | Valid                 | 32 | 64.0  |
|       | Excluded <sup>a</sup> | 18 | 36.0  |
|       | Total                 | 50 | 100.0 |

a. Listwise deletion based on all variables in the procedure.

**Reliability Statistics**

| Cronbach's Alpha | N of Items |
|------------------|------------|
| .774             | 6          |

#### Item-Total Statistics

|                       | Scale Mean if Item Deleted | Scale Variance if Item Deleted | Corrected Item-Total Correlation | Cronbach's Alpha if Item Deleted |
|-----------------------|----------------------------|--------------------------------|----------------------------------|----------------------------------|
| FastFood_Peeledfruits | 9.0625                     | 2.060                          | .383                             | .778                             |
| FastFood_brownbread   | 9.0000                     | 2.129                          | .390                             | .772                             |
| FastFood_whitebread   | 8.9375                     | 2.060                          | .585                             | .729                             |
| FastFood_friedpotato  | 9.0000                     | 1.871                          | .654                             | .706                             |
| FastFood_legumes      | 9.0000                     | 1.935                          | .585                             | .724                             |
| FastFood_cookedveg    | 9.0625                     | 1.867                          | .563                             | .729                             |

#### Scale Statistics

| Mean    | Variance | Std. Deviation | N of Items |
|---------|----------|----------------|------------|
| 10.8125 | 2.738    | 1.65466        | 6          |

#### Section 4: Perceptions towards foods rich in DF's (4 items)

#### Case Processing Summary

|       |                       | N  | %     |
|-------|-----------------------|----|-------|
| Cases | Valid                 | 29 | 58.0  |
|       | Excluded <sup>a</sup> | 21 | 42.0  |
|       | Total                 | 50 | 100.0 |

a. Listwise deletion based on all variables in the procedure.

#### Reliability Statistics

| Cronbach's Alpha | N of Items |
|------------------|------------|
| .779             | 4          |

#### Item-Total Statistics

|            | Scale Mean if Item Deleted | Scale Variance if Item Deleted | Corrected Item-Total Correlation | Cronbach's Alpha if Item Deleted |
|------------|----------------------------|--------------------------------|----------------------------------|----------------------------------|
| High_Price | 5.3103                     | 1.793                          | .645                             | .692                             |

|                         |        |       |      |      |
|-------------------------|--------|-------|------|------|
| Do_Not_Like_Taste       | 5.6552 | 1.948 | .562 | .736 |
| Limited_Health_Benefits | 5.3448 | 1.805 | .578 | .729 |
| Not_easily_Available    | 5.7241 | 1.921 | .549 | .742 |

**Scale Statistics**

| Mean   | Variance | Std. Deviation | N of Items |
|--------|----------|----------------|------------|
| 7.3448 | 3.091    | 1.75816        | 4          |
